# Supplementary material
Source: publisher site journal article supplement (https://www.dovepress.com/get_supplementary_file.php?f=323316.docx)
Supplement: Supplementary file 1 [file get_supplementary_file.php]

# Supplementary material

**Table S1**. Association between patient’s demographics, comorbidities, hospitalization characteristics and physical and social HRQoL(part 1)

scores.

| **EW** | **RE** | **SF** | **RP** | **PF** |  |  |
| --- | --- | --- | --- | --- | --- | --- |
| value *p* | value *p* | value *p* | value *p* | value  *p* | n |  |
| **Demographics** | | | | | | |
| -0.05 0.668 | -0.03 0.803 | -0.13 0.293 | -0.08 0.510 | -0.20 0.107 | 66 | Age (years), rs |
|  |  |  |  |  |  | Gender |
| 72 (50-88) 0.500 | 100 (0-100) 0.790 | 87.5 (43.7-100) 0.800 | 75 (12.5-100) 0.750 | 85 (50-100) 0.460 | 29 | Male |
| 76 (56-88) | 100 (16.7-100) | 87.5 (50-100) | 100 (25-100) | 75 (35-95) | 37 | Female |
| **Comorbidities** | | | | | | |
|  |  |  |  |  |  | Smoking |
| 76 (52-88) 0.686 | 100 (0-100) 0.405 | 81.2 (50.0-100) 0.959 | 85 (43.7-100) 0.916 | 87.5 (25.0-100) 0.104 | 58 | Never |
| 68 (17-94) | 100 (25-100) | 87.5 (21.9-100) | 60 (21.2-76.2) | 87.5 (6.2-100) | 8 | Ever |
|  |  |  |  |  |  | Hypertension |
| 76 (52-88) 0.798 | 100 (33.3-100) 0.771 | 87.5 (50-100) 0.518 | 100 (25-100) 0.496 | 85 (55-100) 0.056 | 45 | No |
| 72 (52-88) | 100 (0-100) | 87.5 (37.5-100) | 50 (25-100) | 65 (22.5-92.5) | 21 | Yes |
|  |  |  |  |  |  | Ischemic heart disease |
| 76 (52.0-88.0) 0.277 | 100 (33.3-100) 0.284 | 87.5 (50-100.0) 0.036 | 100 (25-100.0) 0.031 | 85 (52.5-100) 0.004 | 57 | No |
| 64 (14.0-84.0) | 66.6 (0.0-100.0) | 62.5 (6.2-87.5) | 25 (0.0-75.0) | 20 (10.0-72.5) | 9 | yes |
|  |  |  |  |  |  | Heart failure |
| 76 (53-88) 0.140 | 100 (8.3-100) 0.823 | 87.5 (50-100) 0.174 | 87.5 (25-100) 0.886 | 80 (41.2-98.7) 0.507 | 60 | No |
| 60 (6-79) | 100 (0-100) | 62.5 (18.7-90.6) | 87.5 (0-100) | 72.5 (20.0-92.5) | 6 | Yes |
|  |  |  |  |  |  | Diabetes Mellitus |
| 76 (56-88) 0.093 | 100 (33.3-100) 0.177 | 87.5 (50-100) 0.177 | 100 (25-100) 0.122 | 80 (53.7-100) 0.102 | 50 | No |
| 62 (27-76) | 50 (0-100) | 75 (28.1-96.9) | 37.5 (0-100) | 60 (21.2-90) | 16 | Yes |
|  |  |  |  |  |  | Lung disease |
| 76 (52-88) 0.890 | 100 (0-100) 0.922 | 87.5 (50-100) 0.190 | 100 (25-100) 0.305 | 80 (48.75-100) 0.198 | 58 | No |
| 70 (42.0-92.0) | 83.3 (41.6-100) | 62.5 (37.5-90.6) | 50 (25-87.5) | 47.5 (22.5-88.75) | 8 | Yes |
|  |  |  |  |  |  | Obesity |
| 76 (55-88) 0.621 | 100 (0-100) 0.635 | 87.5 (50-100) 0.541 | 100 (25-100) 0.212 | 82.5 (43.7-100) 0.259 | 42 | No |
| 68 (52-87) | 66.6 (33.3-100) | 81.2 (50-100) | 50 (25-100) | 65 (32.5-93.7) | 24 | Yes |
| -0.09 0.477 | -0.05 0.697 | -0.04 0.742 | -0.14 0.365 | -0.14 0.290 | 59 | BMI, rs |
| **Hospitalization and follow-up** | | | | | | |
| 0.03 0.783 | -0.09 0.470 | -0.04 0.741 | -0.11 0.394 | -0.07 0.600 | 66 | Length of stay, rs |
|  |  |  |  |  |  | Covid status |
| 76 (56.0-92.0) 0.071 | 100 (0-100) 0.231 | 87.5 (62.5-100) 0.489 | 100 (25-100) 0.570 | 85 (60-100) 0.601 | 27 | mild |
| 78 (61-88) | 100 (66.6-100) | 93.7 (53.1-100) | 100 (50-100) | 80 (32.5-98.7) | 20 | moderate |
| 56 (36-76) | 66.6 (0-100) | 62.5 (37.5-100) | 50 (25-100.0) | 70 (30-95) | 19 | severe or criticala |
|  |  |  |  |  |  | Oxygen support |
| 76 (55-88) 0.139 | 100 (25-100) 0.240 | 87.5 (50-100) 0.553 | 100 (25-100) 0.499 | 82.5 (47.5-100) 0.334 | 50 | no |
| 64 (52-79) | 50 (0-100) | 68.75 (40.6-100) | 50 (25-100) | 67.5 (32.5-93.7) | 16 | Yes |
| 0.28 0.022 | 0.18 0.154 | 0.23 0.061 | 0.22 0.074 | 0.25 0.039 | 66 | Follow-up months, rs |

PF- physical function, RP-physical role, SF- social function, RE- emotional role, EW- Emotional well-being, BMI- body mass index, SD- standard deviation, IQR- interquartile range. a- critical n=1

**Table S2** Association between patient’s demographics, comorbidities, hospitalization characteristics and physical and social HRQoL scores (part 2)

GH- general health, HC- health change, BMI- body mass index, SD- standard deviation, IQR- interquartile range. a- Critical n=1.

| **HC** | **GH** | **Vitality** | **Pain** |  |  |
| --- | --- | --- | --- | --- | --- |
| value *p* | value *p* | value  *p* | value  *p* | n |  |
|  | **Demographics** | | | | |
| -0.08 0.543 | -0.18 0.150 | 0.01 0.914 | -0.20 0.104 | 66 | Age (years), rs |
|  |  |  |  |  |  |
| 25 (12.5-50) 0.660 | 60 (35-85) 0.950 | 55 (27.5-87.5) 0.720 | 80 (28.7-100) 0.760 | 29 | Male |
| 25 (25-50) | 60 (40-77.5) | 60 (30-70) | 67.5 (22.5-100) | 37 | Female |
|  | **Comorbidities** | | | | |
|  |  |  |  |  | Smoking |
| 25 (18.7-50) 0.394 | 62.5 (35-81.2) 0.466 | 55 (30-75) 0.992 | 67.5 (32.5-100) 0.365 | 58 | never |
| 37.5 (25-68.7) | 50 (36.2-76.2) | 60 (10.0-87.5) | 28.7 (5.6-100) | 8 | ever |
|  |  |  |  |  | Hypertension |
| 25 (25-50) 0.213 | 65 (42.5-80) 0.219 | 60 (32.5-75) 0.989 | 77.5 (38.7-100) 0.086 | 45 | no |
| 25 (0-50) | 50 (20-82.5) | 55 (27.5-82.5) | 45 (17.5-90) | 21 | yes |
|  |  |  |  |  | Ischemic heart disease |
| 25 (25-50) 0.452 | 65 (40-82.5) 0.080 | 60 (30-77.5) 0.339 | 77.5 (38.7-100) 0.006 | 57 | no |
| 25 (0-50) | 45 (15.0-67.5) | 55 (5-70) | 22.5 (0-57.5) | 9 | yes |
|  |  |  |  |  | Heart failure |
| 25 (25-50) 0.183 | 62.5 (40-80) 0.202 | 57.5 (31.2-75) 0.447 | 67.5 (32.5-100) 0.422 | 60 | no |
| 25 (0-31.2) | 45 (15-70) | 42.5 (8.7-82.5) | 28.7 (16.8-100) | 6 | yes |
|  |  |  |  |  | Diabetes Mellitus |
| 25 (25-50) 0.121 | 65 (45-81.2) 0.012 | 60 (35-75) 0.273 | 80 (41.9-100) 0.007 | 50 | no |
| 25 (0-50) | 37.5 (16.2-63.7) | 40 (21.2-88.7) | 33.7 (22.5-75) | 16 | yes |
|  |  |  |  |  | Lung disease |
| 25 (25-50) 0.077 | 65 (40-85) 0.056 | 60 (30-80) 0.266 | 72.5 (34.4-100) 0.039 | 58 | no |
| 12.5 (0-43.7) | 42.5 (20-55) | 55 (27.5-60) | 22.5 (15.0-63.75) | 8 | yes |
|  |  |  |  |  | Obesity |
| 50 (25-50) 0.157 | 65 (38.7-85) 0.126 | 60 (30-81.2) 0.197 | 85 (45-100) 0.017 | 42 | no |
| 25 (0-50) |  | 50 (27.5-63.7) | 33.7 (22.5-80) | 24 | yes |
| -0.21 0.110 | -0.18 0.170 | -0.13 0.310 | -0.27 0.037 | 59 | BMI, rs |
|  | **Hospitalization and follow-up** | | | | |
| -0.14 0.274 | -0.05 0.711 | 0.03 0.798 | 0.05 0.677 | 66 | Length of stay, rs |
|  |  |  |  |  | Covid status |
| 50 (25-50) 0.139 | 65 (45-80) 0.211 | 55 (30-75) 0.440 | 67.5 (35-100) 0.276 | 27 | mild |
| 37.5 (25-50) | 65 (36.2-83.7) | 60 (50-78.7) | 78.75  (25.0-100.0) | 20 | moderate |
| 25 (0-50) | 45 (35-65) | 45 (25-85) | 45 (22.5-90) | 19 | severe or criticala |
|  |  |  |  |  | Oxygen support |
| 37.5 (25-50) 0.068 | 65 (38.7-80) 0.257 | 60 (33.7-76.2) 0.435 | 72.5 (30-100) 0.426 | 50 | no |
| 25 (0-43.7) | 50 (35-80) | 47.5 (21.2-81.2) | 62.5 (23.1-90) | 16 | yes |
| 0.01 0.933 | 0.16 0.199 | 0.138 0.270 | 0.07 0.600 | 66 | Follow-up months, rs |
